# Supplementary material for: MYOC Promotes the Differentiation of C2C12 Cells by Regulation of the TGF-β Signaling Pathways via CAV1
Source: MDPI journal article supplement (doi:10.3390/biology10070686), 2021-07-20
Supplement: s1 [file s1]

## Supplementary Materials S2:

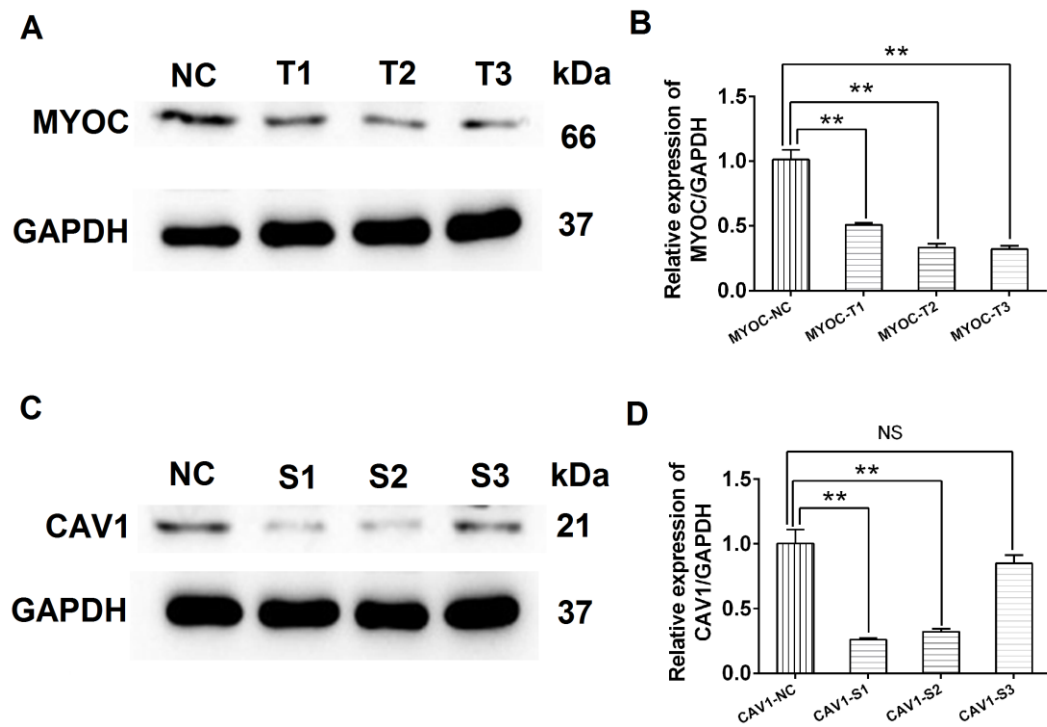

## Supplementary Materials S2. Inhibits screening of fragments

Related to FIGURE 2 and FIGURE 4.

A. MYOC inhibited siRNA sequence screening. B. Grayscale scan of MYOC in Figure A. C. CAV1 inhibited siRNA sequence screening. D. Grayscale scan of CAV1 in Figure C.
