# Supplementary material for: MYOC Promotes the Differentiation of C2C12 Cells by Regulation of the TGF-β Signaling Pathways via CAV1
Source: MDPI journal article supplement (doi:10.3390/biology10070686), 2021-07-20
Supplement: s1 [file s1]

## Supplementary Materials S3:

Part of MYOC's immunoprecipitation mass spectrometry sequencing results

| ProteinID | ProteinName                                         |
|-----------|-----------------------------------------------------|
| O54724    | Caveolae-associated protein 1                       |
| Q60634    | Flotillin-2                                         |
| Q60875    | Rho guanine nucleotide exchange factor 2            |
| Q8CD09    | LIM zinc-binding domain-containing protein          |
| Q8CI51    | PDZ and LIM domain protein 5                        |
| Q8BTS0    | DEAD (Asp-Glu-Ala-Asp) box polypeptide 5            |
| Q78PY7    | Staphylococcal nuclease domain-containing protein 1 |
| O08539    | Myc box-dependent-interacting protein 1             |
| B2RR82    | Intersectin-2                                       |
| A2AMM0    | Caveolae-associated protein 4                       |
| P11087    | Collagen alpha-1(I) chain                           |
| P53690    | Matrix metalloproteinase-14                         |
| Q63918    | Caveolae-associated protein 2                       |
| Q71LX8    | Heat shock protein 84b                              |
